# Supplementary material
Source: publisher figshare collection journal article supplement (https://gsapubs.figshare.com/ndownloader/files/22745930)
Supplement: Supplementary file 1 [file 22745930]

Data Repository Item  
FIGURE DR1

Pälike et al., p. 1

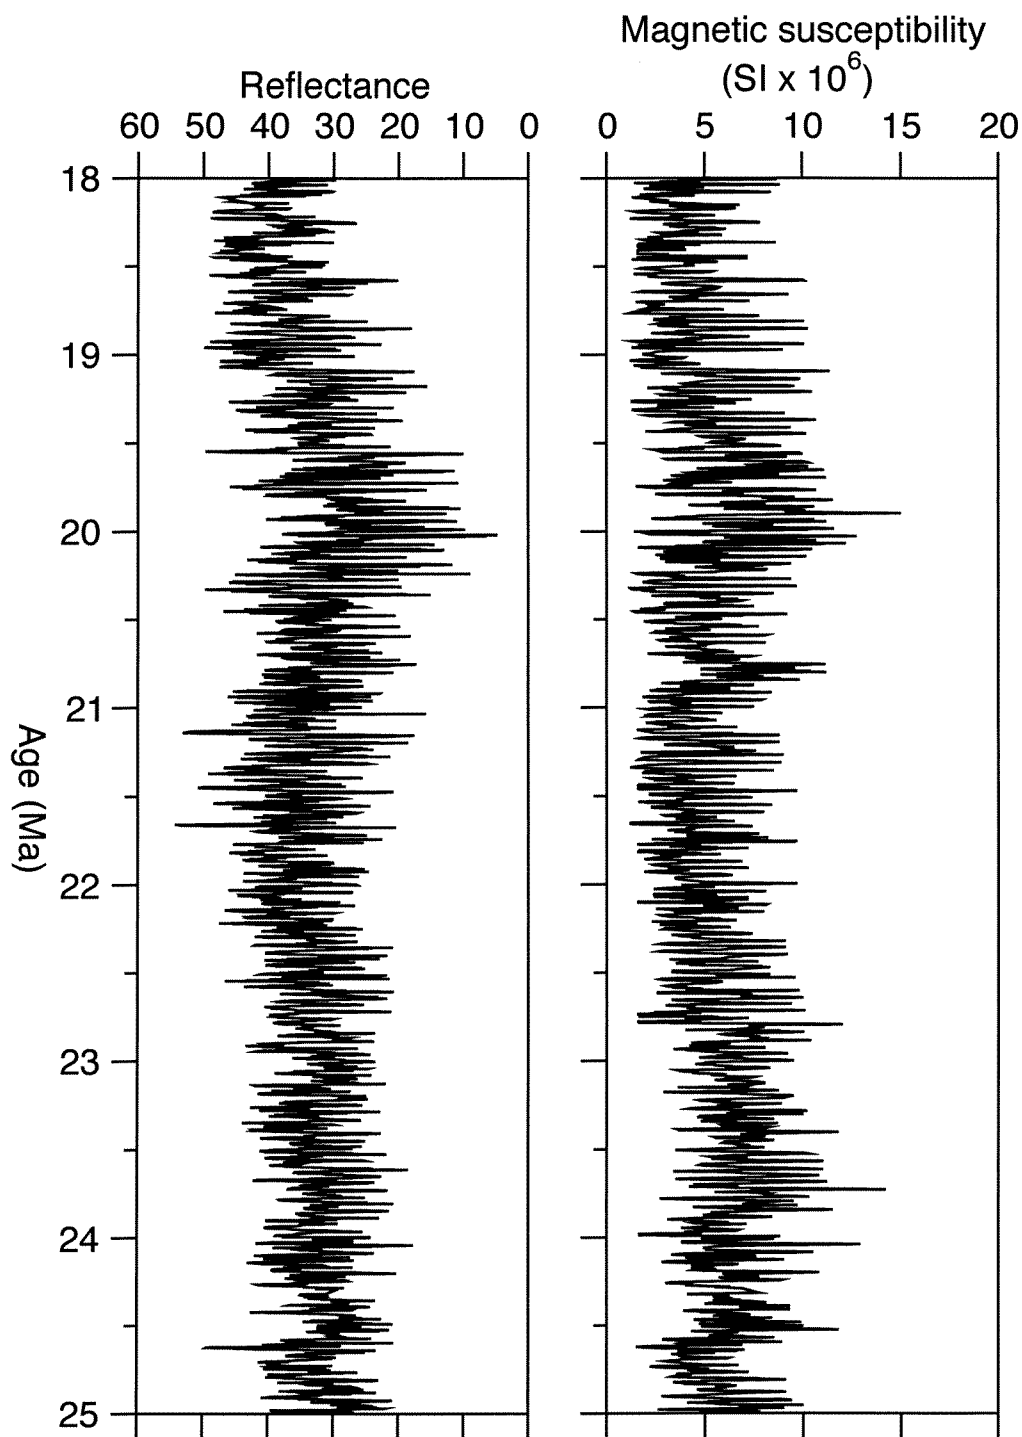

Figure DR1. ODP Leg 154 data (color reflectance and magnetic susceptibility splices) from 18 to 25 Ma, tuned to  $La_{2004}$ .

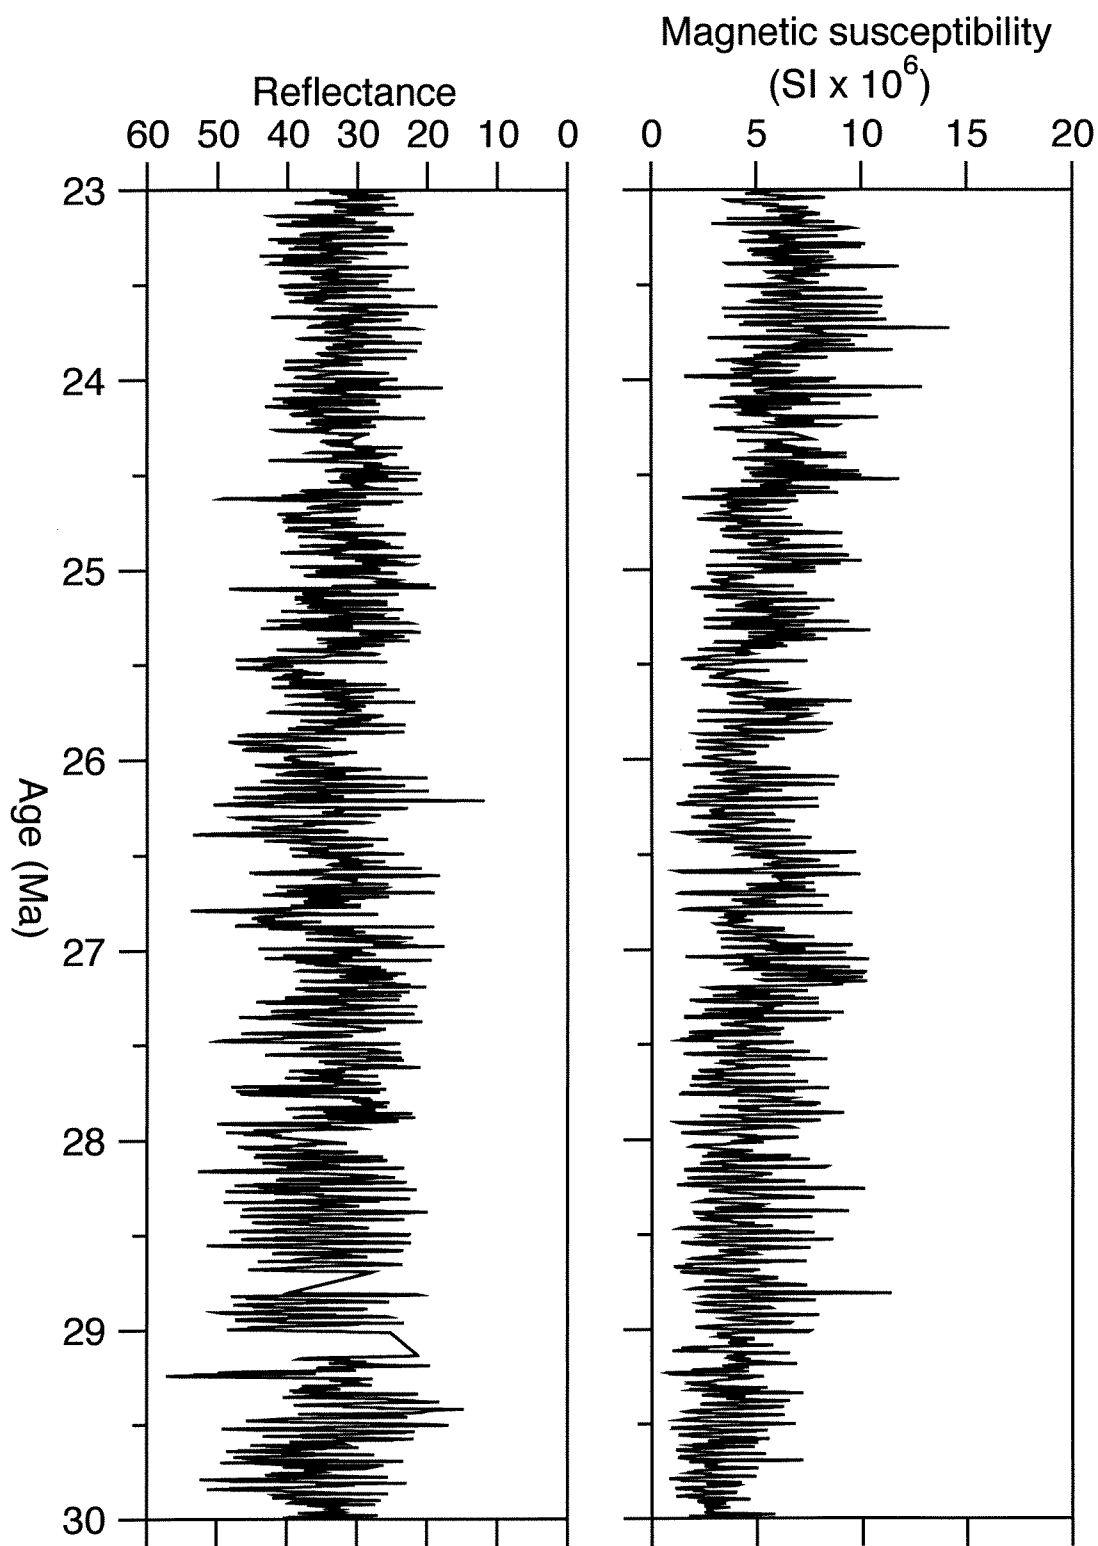

Figure DR2. ODP Leg 154 data (color reflectance and magnetic susceptibility splice) from 23 to 30 Ma, tuned to  $La_{2004}$ .

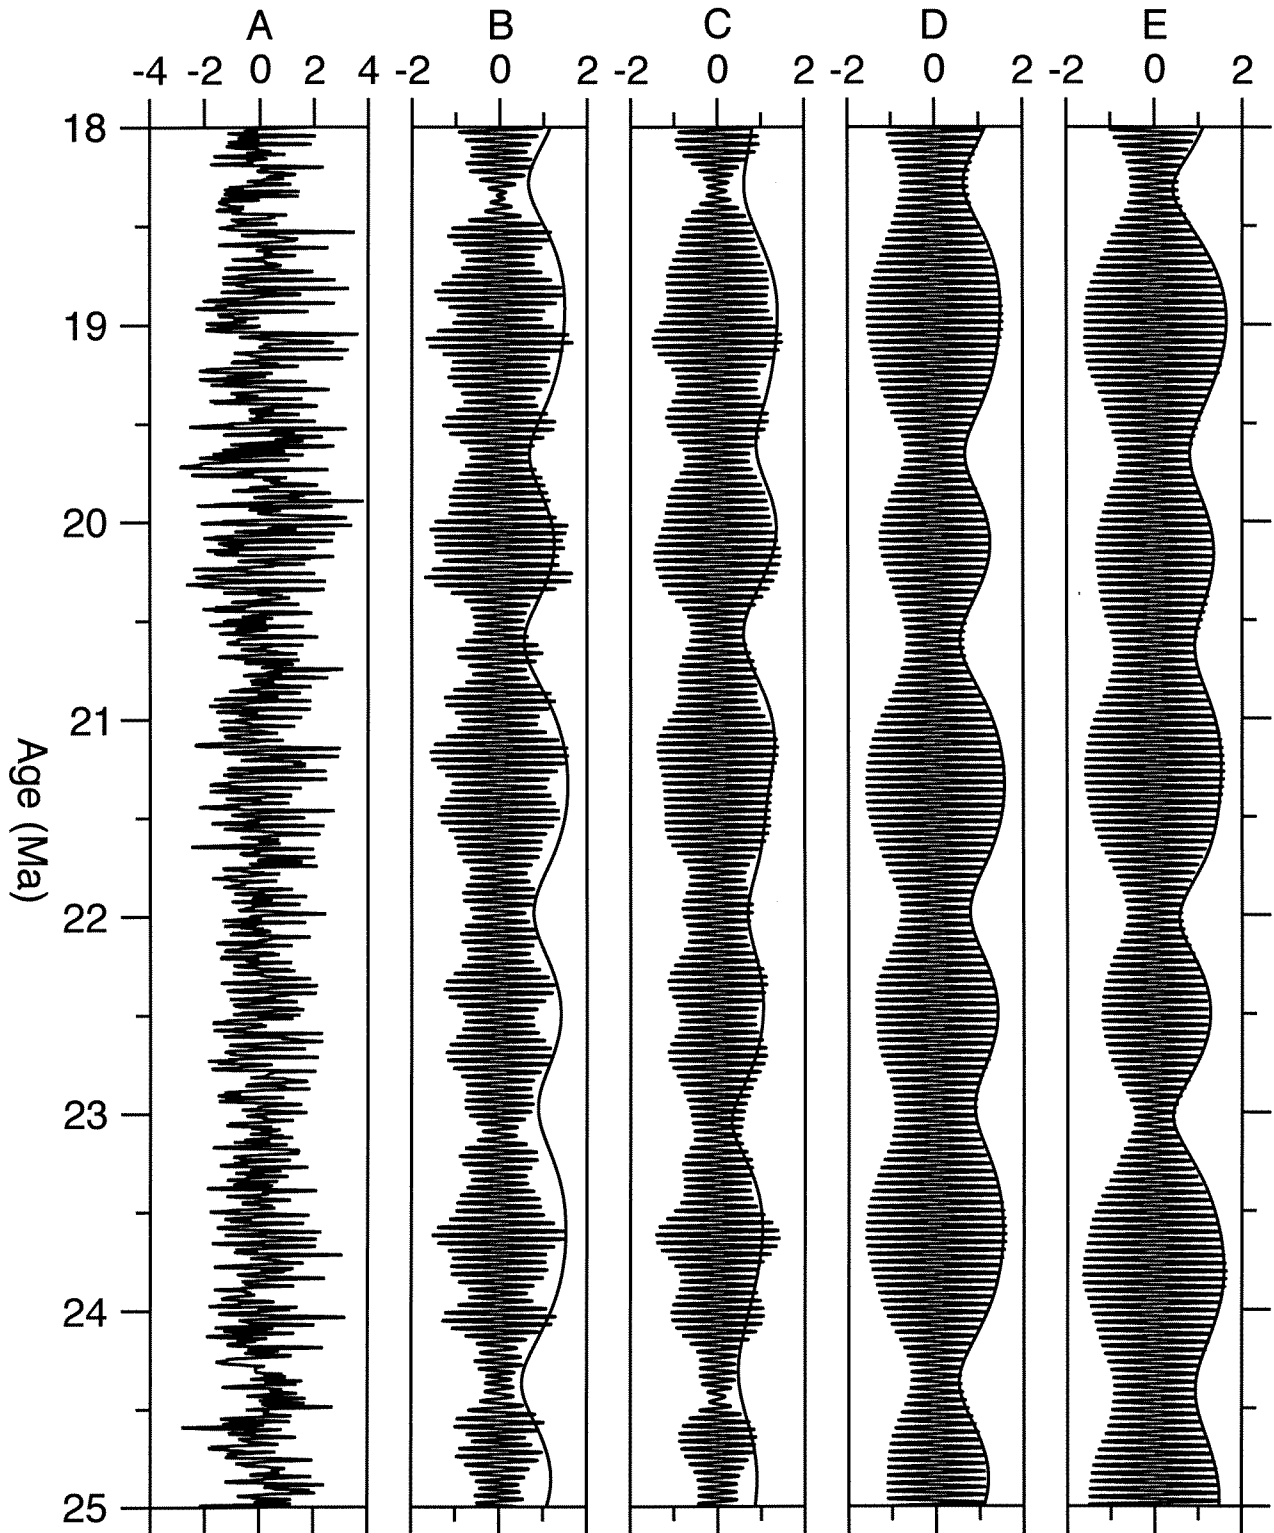

Figure DR3. A: ODP Leg 154 data (combined color reflectance and magnetic susceptibility splices, detrended, standardized to zero mean and standard deviation) from 18 to 25 Ma, tuned to  $La_{2004}$ . Obliquity filters and demodulations of A tuned to  $La_{2004}$  (B) and  $La_{1993}$  (C). Obliquity filters and demodulations of astronomical obliquity calculations for  $La_{2004}$  (D) and  $La_{1993}$  (E). Filters were calculated between frequencies of 22 and 28  $m.y.^{-1}$ .

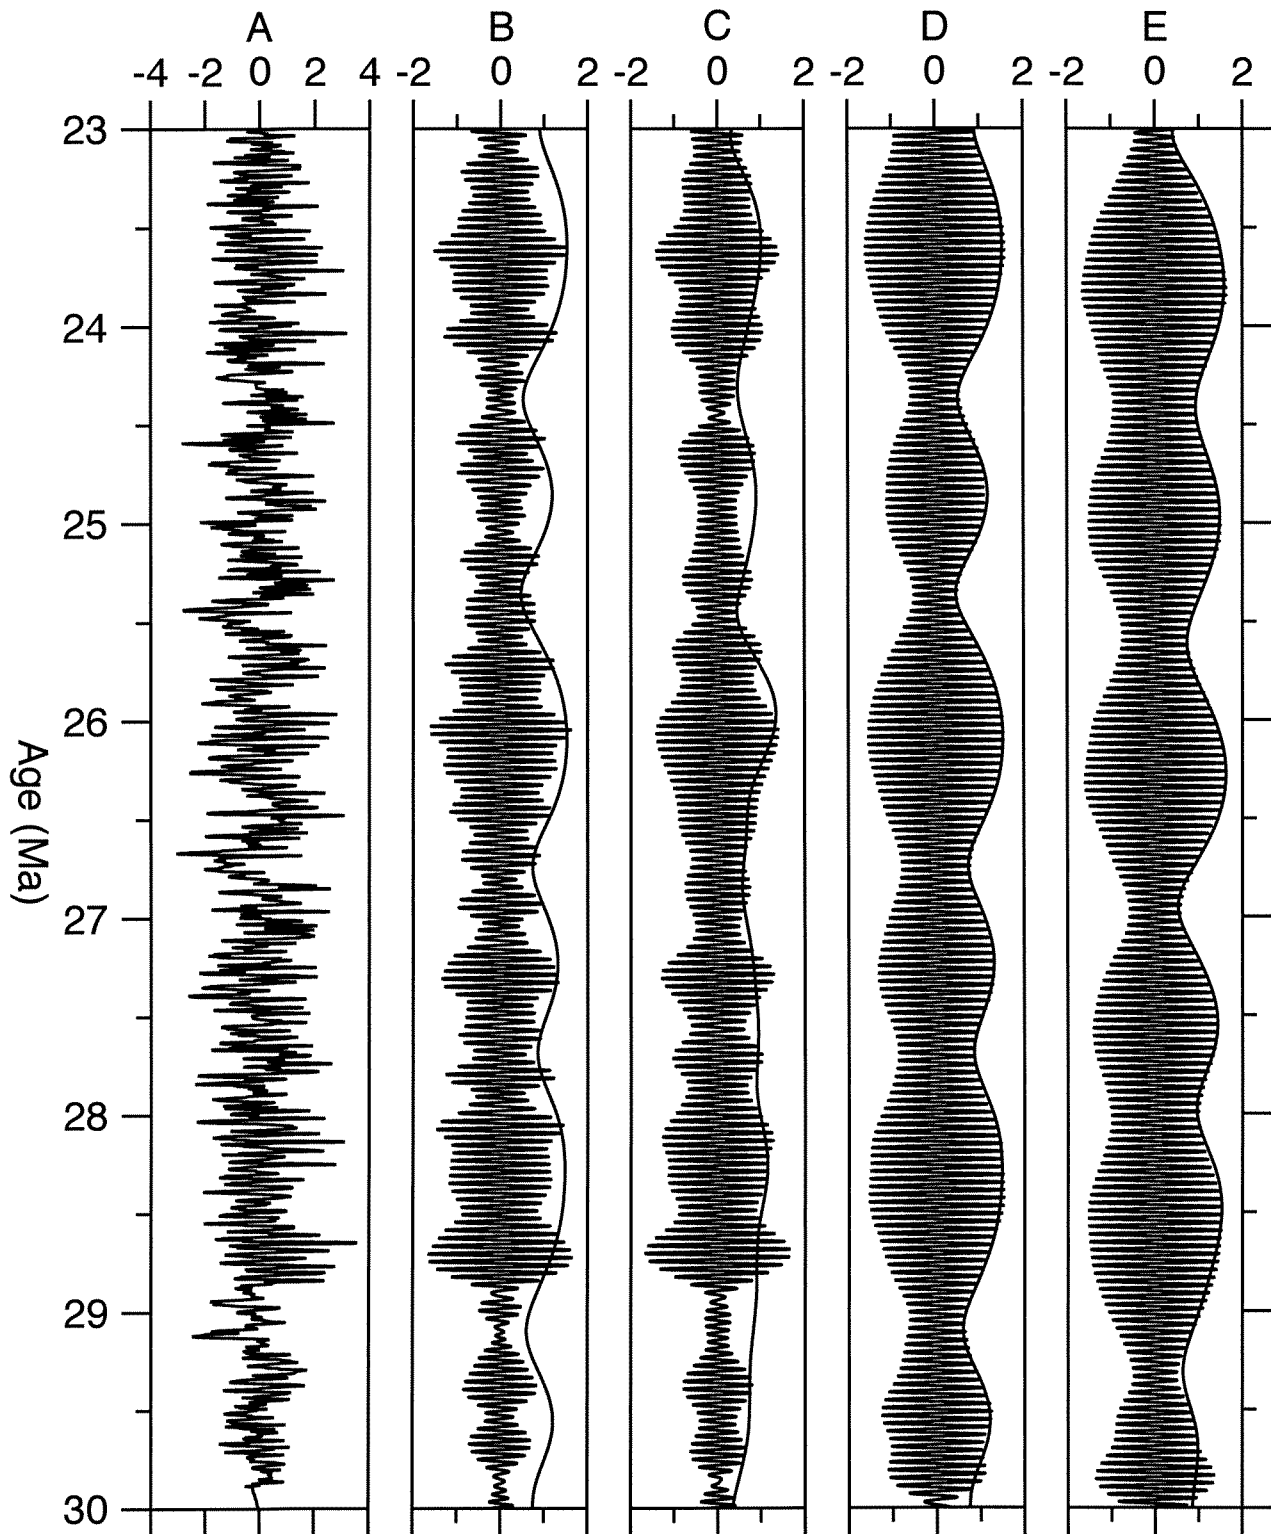

Figure DR4. A: ODP Leg 154 data (combined color reflectance and magnetic susceptibility splices, detrended, standardized to zero mean and standard deviation) from 23 to 30 Ma, tuned to  $La_{2004}$ . Obliquity filters and demodulations of A tuned to  $La_{2004}$  (B) and  $La_{1993}$  (C). Obliquity filters and demodulations of astronomical obliquity calculations for  $La_{2004}$  (D) and  $La_{1993}$  (E). Filters were calculated between frequencies of 22 and 28  $m.y.^{-1}$ .

## FIGURE DR5

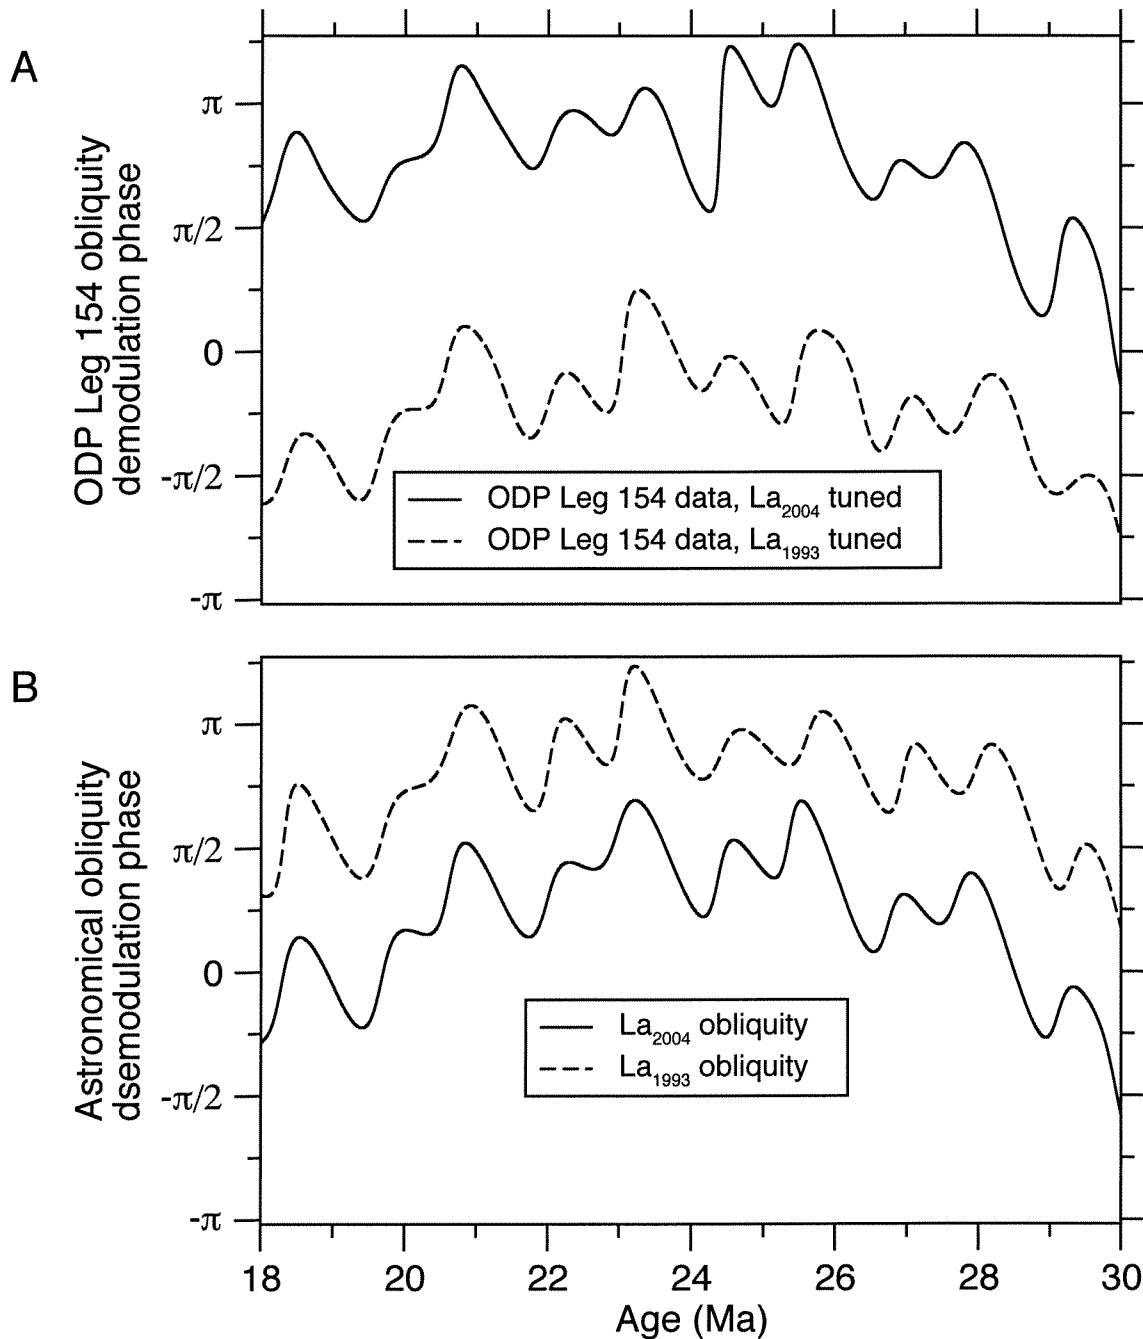

Figure DR5. A: Phase output (in radians) from obliquity demodulations for ODP Leg 154 data tuned to  $La_{2004}$  and  $La_{1993}$ . The concave shape arises from demodulating at a fixed frequency for an obliquity signal that changes due to tidal dissipation. B: Phase output from obliquity amplitude demodulations for  $La_{2004}$  and  $La_{1993}$ . The absolute phase angles depend on the exact demodulation frequencies. The results show that the obliquity cycles were well adjusted between the geological data and the astronomical calculations.

FIGURE DR6

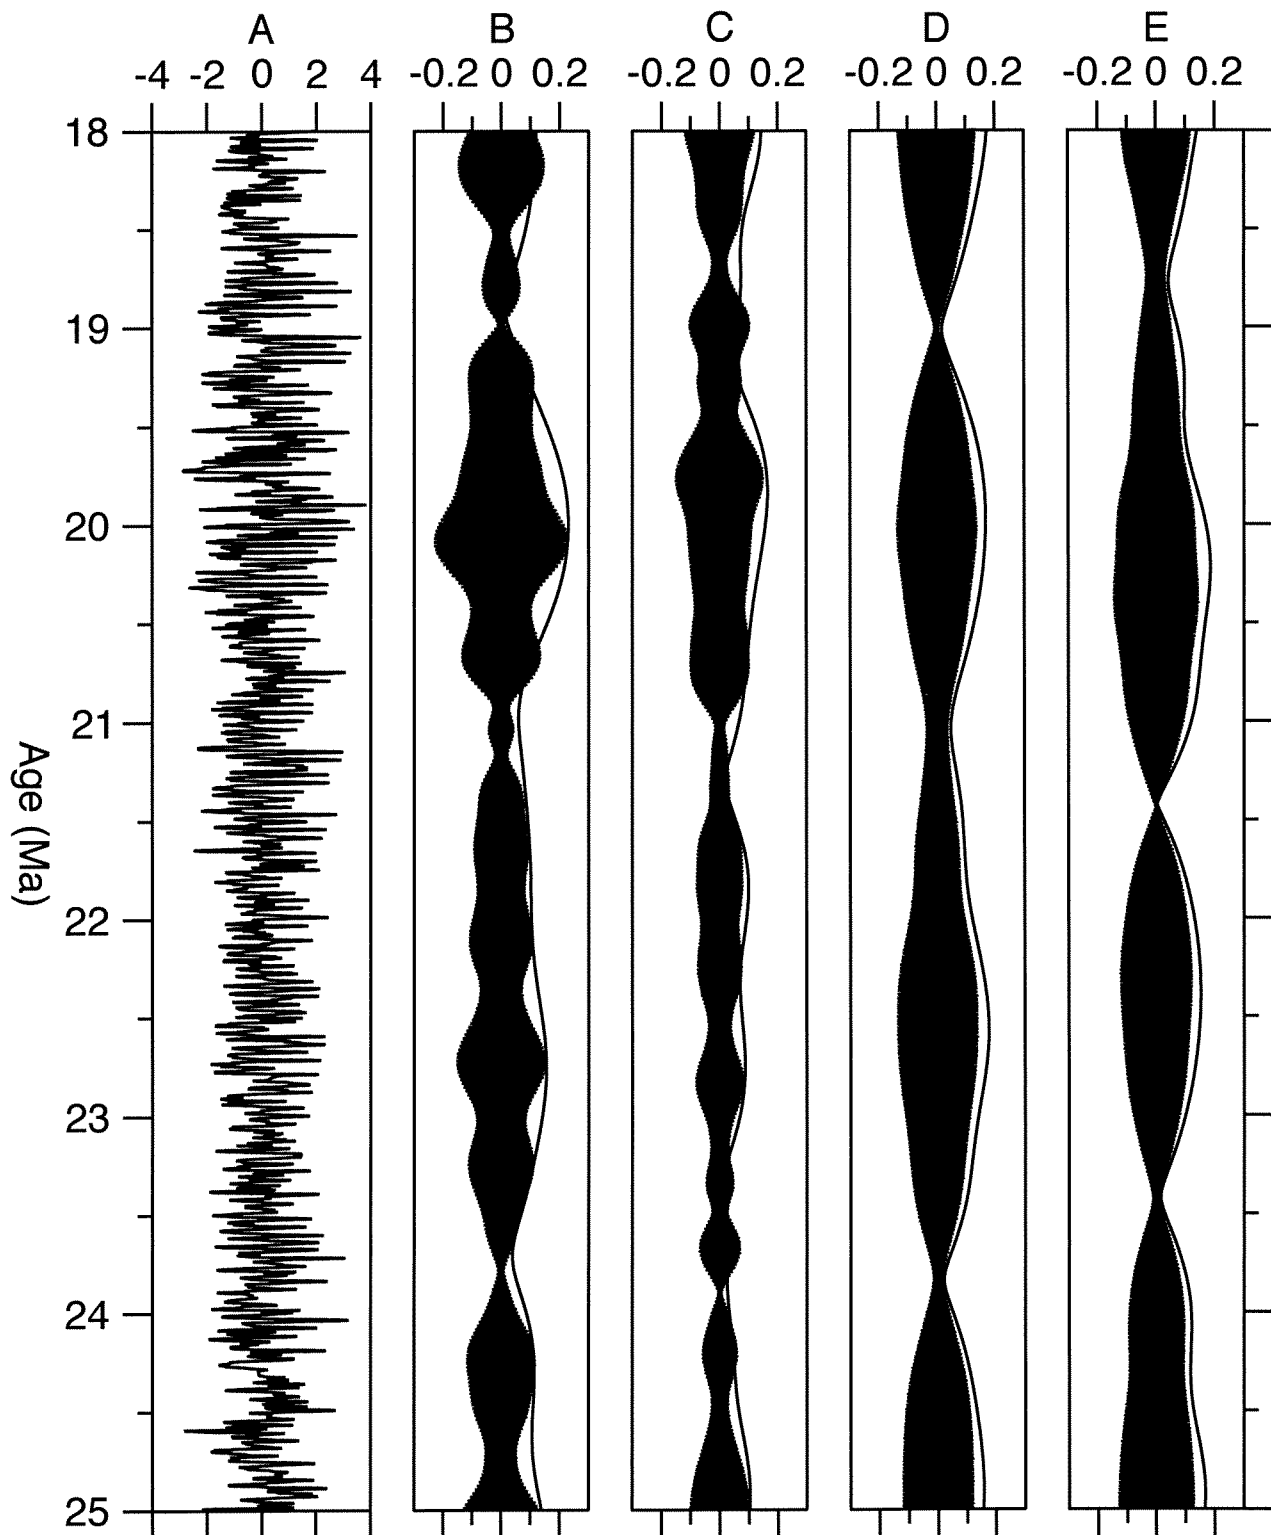

Figure DR6. A: ODP Leg 154 data (combined color reflectance and magnetic susceptibility splices, detrended, standardized to zero mean and standard deviation) from 18 to 25 Ma, tuned to  $La_{2004}$ . 19 k.y. precession filters and demodulations of A tuned to  $La_{2004}$  (B) and  $La_{1993}$  (C). 19 k.y. precession filters and demodulations of astronomical obliquity calculations for  $La_{2004}$  (D) and  $La_{1993}$  (E). Filters were calculated between frequencies of 51 and 55  $m.y.^{-1}$

FIGURE DR7

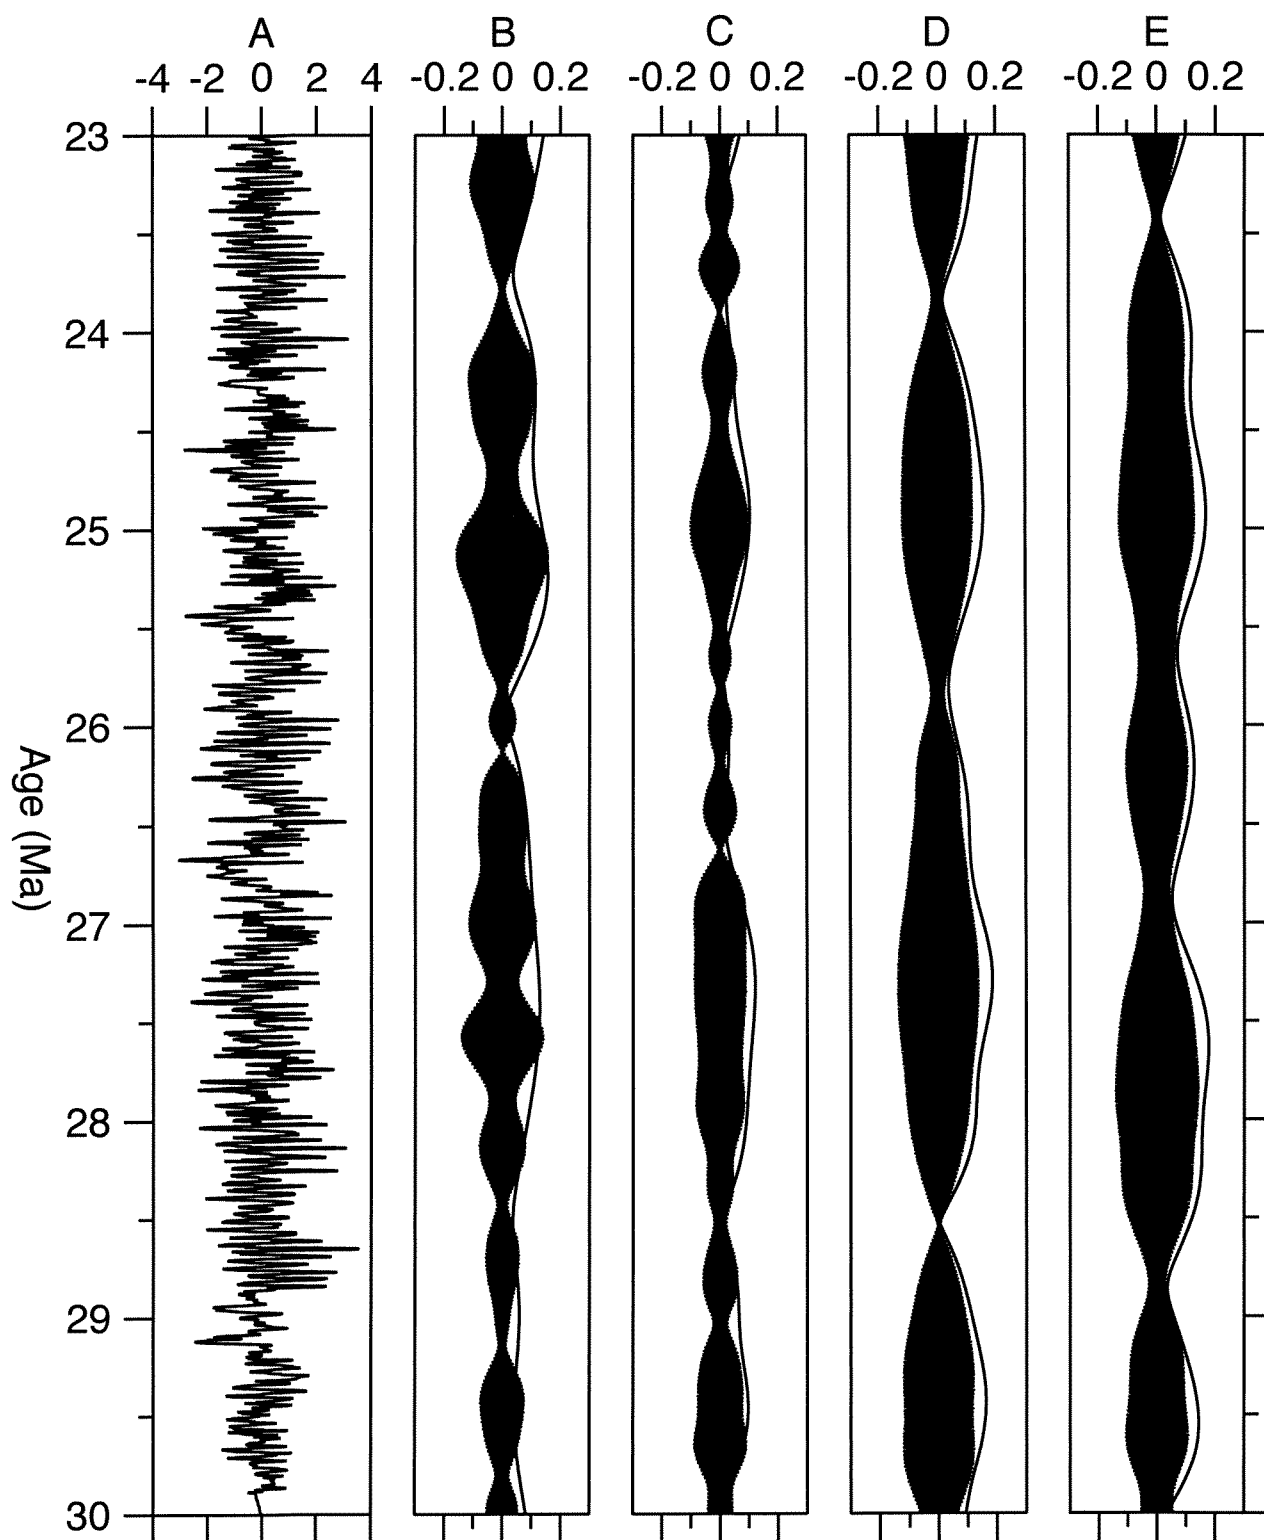

Figure DR7. A: ODP Leg 154 data (combined color reflectance and magnetic susceptibility splices, detrended, standardized to zero mean and standard deviation) from 23 to 30 Ma, tuned to  $La_{2004}$ . 19 k.y. precession filters and demodulations of A tuned to  $La_{2004}$  (B) and  $La_{1993}$  (C). 19 k.y. precession filters and demodulations of astronomical obliquity calculations for  $La_{2004}$  (D) and  $La_{1993}$  (E). Filters were calculated between frequencies of 51 and 55  $m.y.^{-1}$

## FIGURE DR8

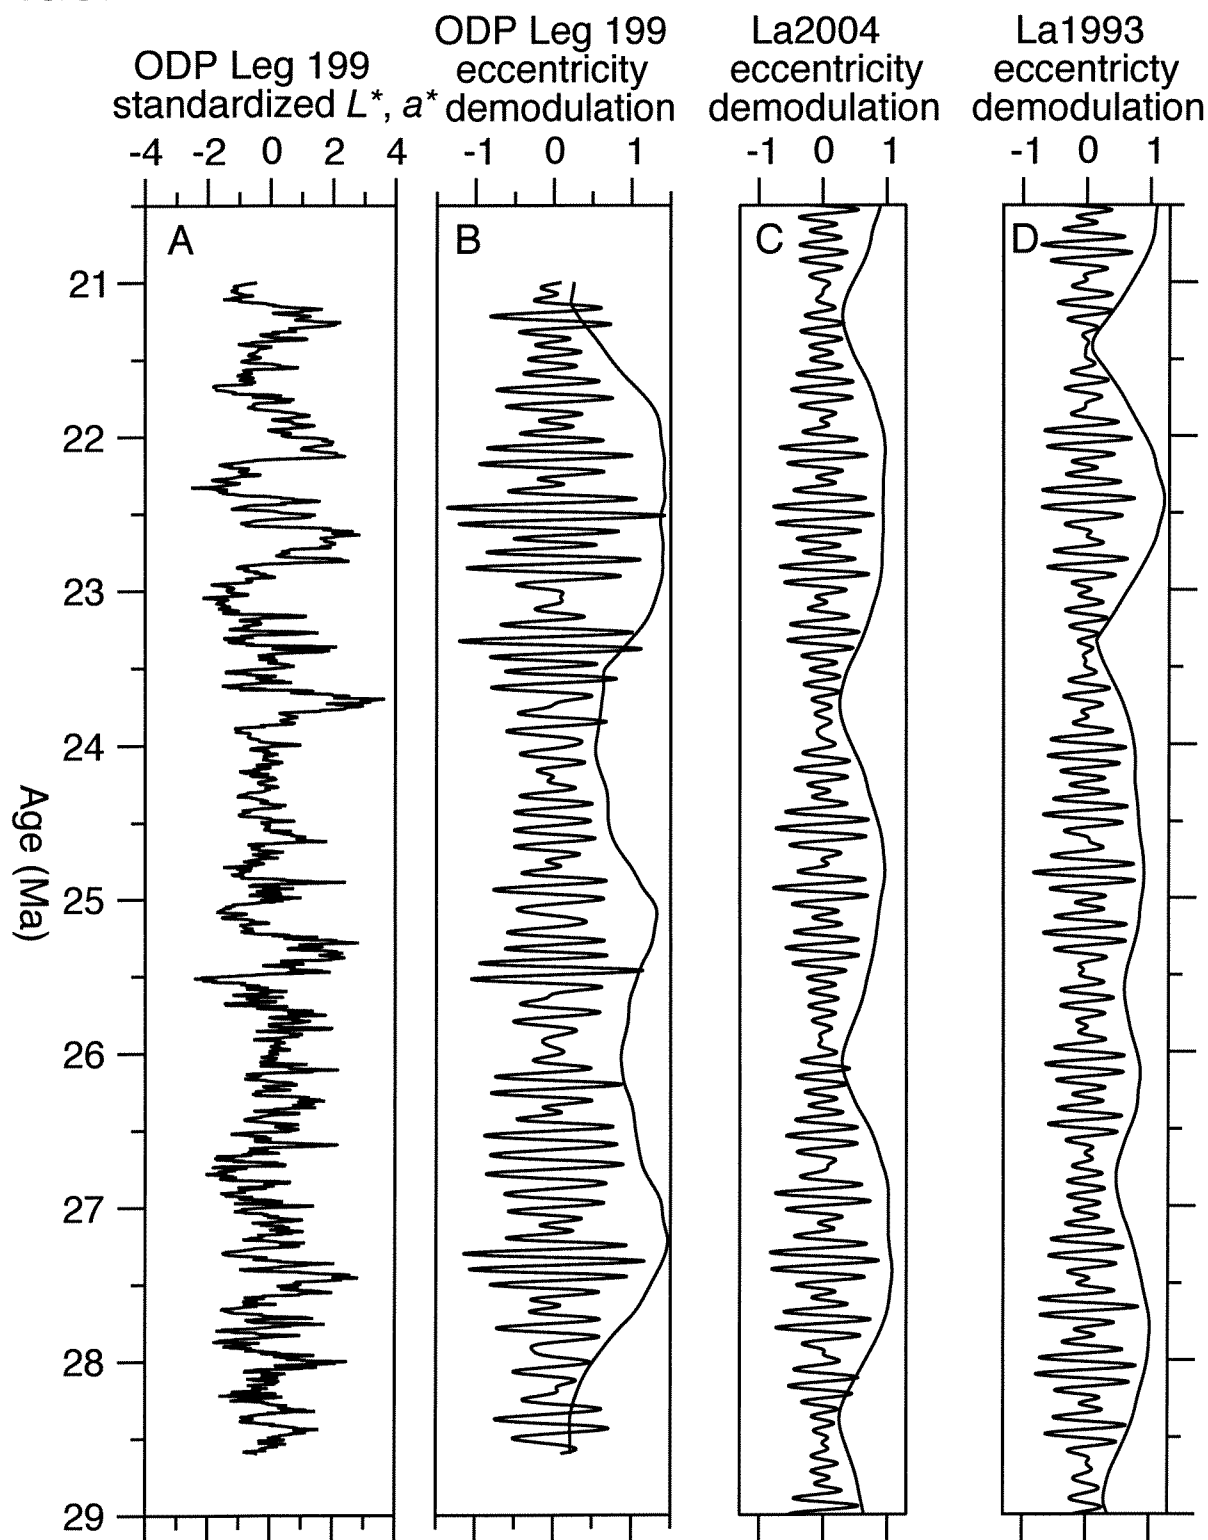

Figure DR8. A: ODP Leg 199 data (combined color reflectance  $L^*$  and  $a^*$ , detrended, standardized to zero mean and standard deviation) from 21 to 28.5 Ma, tuned to  $La_{2004}$ . B: Ca. 100 k.y. eccentricity filters and demodulations of A tuned to  $La_{2004}$ . C and D: Ca. 100 k.y. eccentricity filters and demodulations of astronomical calculations for  $La_{2004}$  (C) and  $La_{1993}$  (D). Filters were calculated between frequencies of 6 and 12 m.y.<sup>-1</sup>



TABLE DR1. ORIGIN OF AMPLITUDE MODULATION TERMS

| Short eccentricity amplitude modulation terms                        |                   |                            |
|----------------------------------------------------------------------|-------------------|----------------------------|
| Interfering terms                                                    | "Beat" term       | Period                     |
| $(g_4 - g_5) - (g_4 - g_2)$                                          | $= (g_2 - g_5)$   | $\approx 400 \text{ k.y.}$ |
| $(g_3 - g_5) - (g_3 - g_2)$                                          |                   |                            |
| ...                                                                  | ...               | ...                        |
| Short and long eccentricity amplitude modulation terms               |                   |                            |
| Interfering terms                                                    | "Beat" term       | Period                     |
| $(g_4 - g_5) - (g_3 - g_5)$                                          | $= (g_4 - g_3)$   | $\approx 2.4 \text{ m.y.}$ |
| $(g_4 - g_2) - (g_3 - g_2)$                                          |                   |                            |
| ...                                                                  | ...               | ...                        |
| Climatic precession amplitude modulation terms                       |                   |                            |
| Interfering terms                                                    | "Beat" term       | Period                     |
| Identical to eccentricity frequencies and amplitude modulation terms |                   |                            |
| Obliquity amplitude modulation terms                                 |                   |                            |
| Interfering terms                                                    | "Beat" term       | Period                     |
| $(p + s_3) - (p + s_4)$                                              | $= (s_3 - s_4)$   | $\approx 1.2 \text{ m.y.}$ |
| $(p + s_3 + g_4 - g_3) - (p + s_3 - g_4 + g_3)$                      | $= (2g_4 - 2g_3)$ | $\approx 1.2 \text{ m.y.}$ |
| $(p + s_3) - (p + s_3 + g_4 - g_3)$                                  | $= (g_4 - g_3)$   | $\approx 2.4 \text{ m.y.}$ |
| $(p + s_3) - (p + s_3 - g_4 + g_3)$                                  |                   |                            |
| $(p + s_3) - (p + s_6)$                                              | $= (s_3 - s_6)$   | $\approx 173 \text{ k.y.}$ |
| ...                                                                  | ...               | ...                        |

Table DR1. Origin of amplitude modulation terms that affect the Earth's eccentricity, obliquity and climatic precession. Individual  $g_k$  and  $s_k$  terms refer to those given by Laskar (1990, 2004b). The  $\sim 100$ -k.y.-period (short) eccentricity cycles are modulated with a period of  $\sim 405$  k.y. by the long eccentricity cycle. Both short and long eccentricity cycles are modulated with a period of  $\sim 2.4$  m.y., but with a phase difference of  $180^\circ$ , i.e. an amplitude maximum of the  $\sim 100$  k.y. eccentricity coincides with an amplitude minimum of the  $\sim 405$  k.y. eccentricity. Since eccentricity directly modulates the climatic precession, all eccentricity amplitude modulation terms are also present in the climatic precession signal. The obliquity signal is weakly amplitude modulated with a period of  $\sim 173$  k.y., and more strongly with a period of 1.2 m.y. This amplitude modulation cycle is dynamically linked to the  $\sim 2.4$  m.y. cycle present in the eccentricity modulation.
